# Supplementary material for: Insights into the habitat associations, phylogeny, and diet of Pipistrellus maderensis in Porto Santo, northeastern Macaronesia
Source: Copernicus journal article supplement (doi:10.5194/we-23-87-2023), 2023-08-01
Supplement: Supplementary file 1 [file we-23-87-2023-supplement.pdf]

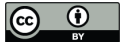

*Supplement of*

**Insights into the habitat associations, phylogeny, and diet of *Pipistrellus maderensis* in Porto Santo, northeastern Macaronesia**

**Eva K. Nóbrega et al.**

*Correspondence to:* Eva K. Nóbrega (eva.keltanen@hotmail.com)

The copyright of individual parts of the supplement might differ from the article licence.

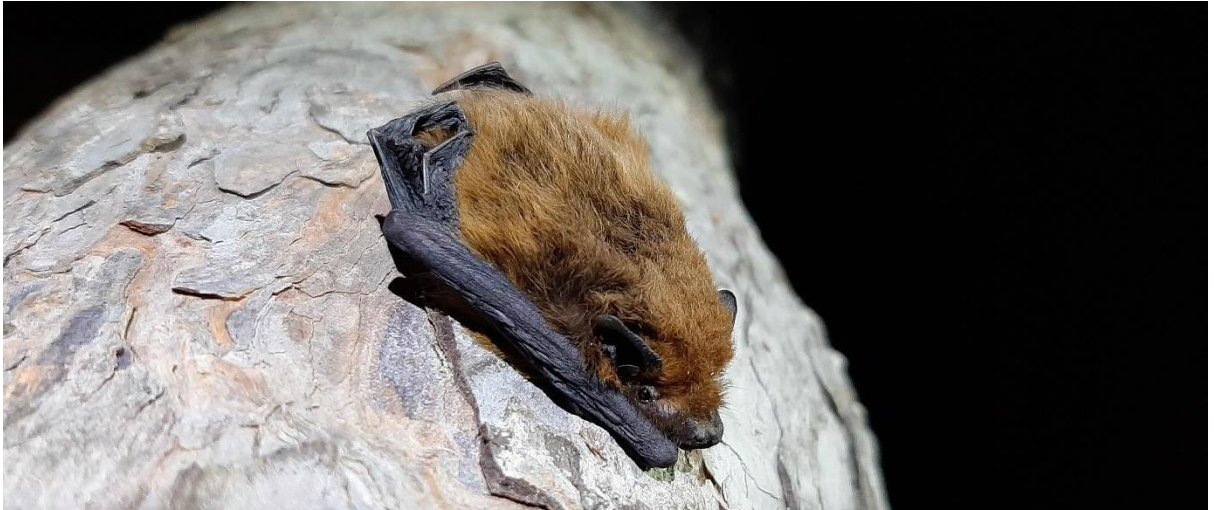

**Figure S1** Photo of one of the captured *Pipistrellus maderensis*.

**Table S1.** Percentage coverage of each considered land use in Porto Santo Island and number of sampling sites per land use category.

| Land-use      | % of land use | No. sampling sites | % of sites per land use |
|---------------|---------------|--------------------|-------------------------|
| Built-up area | 17            | 9                  | 17                      |
| Agriculture   | 7             | 8                  | 15                      |
| Forest        | 5             | 1                  | 2                       |
| Grassland     | 48            | 28                 | 54                      |
| Bare Soil     | 23            | 6                  | 12                      |

**Table S2.** Number of bat passes per site, percentage of land cover (Forest, Grassland, Non vegetated) within the 250 m buffer surrounding the sampling site and distance to the nearest water point (D\_water).

| Site | Latitude | Longitude | No.bat passes | Forest | Grassland | Non-Vegetated | D_water (m) |
|------|----------|-----------|---------------|--------|-----------|---------------|-------------|
| 1    | 33,0723  | -16,3078  | 0             | 0      | 100       | 0             | 650,89      |
| 2    | 33,07022 | -16,298   | 0             | 0      | 9,05      | 90,95         | 1334,61     |
| 3    | 33,06124 | -16,3698  | 0             | 0      | 41,02     | 0             | 697,91      |
| 4    | 33,06124 | -16,3519  | 16            | 0      | 0         | 0             | 653,53      |
| 5    | 33,064   | -16,3443  | 20            | 0      | 0         | 0             | 466,50      |
| 6    | 33,06124 | -16,3339  | 0             | 0      | 0         | 0             | 463,41      |
| 7    | 33,06191 | -16,3025  | 0             | 0      | 10,55     | 89,45         | 1890,71     |
| 8    | 33,04988 | -16,3763  | 0             | 0      | 100       | 0             | 557,98      |
| 9    | 33,05226 | -16,3609  | 2             | 0      | 6,76      | 0             | 84,19       |
| 10   | 33,04103 | -16,3888  | 0             | 0      | 99,51     | 0             | 1410,07     |
| 11   | 33,03748 | -16,3838  | 131           | 0      | 100       | 0             | 991,89      |
| 12   | 33,04874 | -16,3673  | 12            | 0      | 93,42     | 0             | 520,48      |
| 13   | 33,04329 | -16,3609  | 4             | 0      | 35,76     | 0             | 474,12      |
| 14   | 33,03431 | -16,3878  | 2             | 0      | 100       | 0             | 1476,01     |
| 15   | 33,03431 | -16,3788  | 6             | 0      | 78,10     | 21,90         | 823,01      |
| 16   | 33,03431 | -16,3698  | 53            | 0      | 100       | 0             | 763,37      |
| 17   | 33,02533 | -16,3788  | 0             | 0      | 51,94     | 48,06         | 1733,81     |
| 18   | 33,09548 | -16,3239  | 0             | 38,28  | 61,47     | 0,25          | 1339,61     |
| 19   | 33,09715 | -16,316   | 4             | 0      | 84,49     | 15,51         | 904,04      |
| 20   | 33,09556 | -16,3114  | 0             | 0      | 83,97     | 16,03         | 595,67      |
| 21   | 33,0952  | -16,2983  | 0             | 0      | 0         | 100           | 1213,00     |
| 22   | 33,08817 | -16,3429  | 63            | 0      | 6,41      | 11,63         | 992,09      |
| 23   | 33,08817 | -16,3339  | 10            | 0,01   | 99,99     | 0             | 1602,94     |
| 24   | 33,09045 | -16,3271  | 2             | 28,18  | 71,81     | 0             | 1435,87     |
| 25   | 33,09067 | -16,3112  | 1888          | 0      | 100       | 0             | 58,45       |
| 26   | 33,08673 | -16,3068  | 0             | 0      | 100       | 0             | 23,87       |
| 27   | 33,09391 | -16,3025  | 18            | 0      | 16,19     | 83,81         | 883,46      |
| 28   | 33,07785 | -16,3667  | 0             | 0      | 47,68     | 35,17         | 1287,02     |

|    |          |          |      |      |       |       |         |
|----|----------|----------|------|------|-------|-------|---------|
| 29 | 33,08093 | -16,361  | 0    | 0    | 0     | 77,45 | 1166,18 |
| 30 | 33,08066 | -16,3528 | 3    | 0    | 0     | 23,70 | 395,89  |
| 31 | 33,08301 | -16,3415 | 1180 | 0,12 | 99,88 | 0     | 707,48  |
| 32 | 33,0792  | -16,3339 | 118  | 100  | 0     | 0     | 949,15  |
| 33 | 33,07985 | -16,3286 | 46   | 7,67 | 92,33 | 0     | 801,86  |
| 34 | 33,08038 | -16,3083 | 329  | 0    | 100   | 0     | 38,50   |
| 35 | 33,07022 | -16,3698 | 0    | 0    | 92,95 | 7,05  | 633,41  |
| 36 | 33,07041 | -16,3581 | 0    | 0    | 70,18 | 0     | 775,94  |
| 37 | 33,07107 | -16,3536 | 12   | 0    | 25,19 | 0     | 1152,45 |
| 38 | 33,07008 | -16,3404 | 328  | 0    | 0,85  | 0     | 80,87   |
| 39 | 33,07282 | -16,3337 | 0    | 1,76 | 88,90 | 0     | 575,21  |
| 40 | 33,07079 | -16,3145 | 5    | 0    | 100   | 0     | 968,98  |
| 41 | 33,06405 | -16,3161 | 0    | 0    | 1,29  | 56,72 | 1390,47 |
| 42 | 33,07259 | -16,3269 | 2006 | 0    | 94,80 | 5,20  | 22,93   |
| 43 | 33,07253 | -16,3276 | 33   | 0    | 93,37 | 2,26  | 7,318   |
| 44 | 33,04267 | -16,3744 | 5    | 0    | 100   | 0     | 264,28  |
| 45 | 33,06638 | -16,365  | 1474 | 0    | 100   | 0     | 48,81   |
| 46 | 33,06733 | -16,3403 | 27   | 0    | 1,65  | 0     | 12,39   |

**Table S3.** Information regarding the genetic samples of *Pipistrellus maderensis* from Porto Santo used in the phylogenetic analysis of this study.

| Specimen Code | Locality     | Geographic coordinates           | GenBank Accession Code |
|---------------|--------------|----------------------------------|------------------------|
| PMAD1         | Pico Castelo | 33° 4' 51.4704", -16° 20' 1.932" | OQ260006               |
| PMAD2         | Pico Castelo | 33° 4' 51.4704", -16° 20' 1.932" | OQ260003               |
| PMAD3         | Pico Castelo | 33° 4' 51.4704", -16° 20' 1.932" | OQ260005               |
| PMAD4         | Pico Castelo | 33° 4' 51.4704", -16° 20' 1.932" | OQ260004               |
| PMAD5         | Pico Castelo | 33° 4' 51.4704", -16° 20' 1.932" | OQ260001               |
| PMAD6         | Pico Castelo | 33° 4' 51.4704", -16° 20' 1.932" | OQ260002               |

**Table S4.** Forearm length, weight, age, sex, and reproductive status of the Madeiran pipistrelles *Pipistrellus maderensis* captured during this study. Abbreviations: Female (F), Male (M), LAC (lactating), NR (Non-reproductive).

| Forearm length (mm) | Weight (g) | Age      | Sex | Reproductive status |
|---------------------|------------|----------|-----|---------------------|
| 32,3                | 3,78       | Juvenile | F   | NR                  |

|       |      |          |   |     |
|-------|------|----------|---|-----|
| 33,2  | 3,74 | Adult    | F | NR  |
| 33,7  | 4,59 | Adult    | F | LAC |
| 32,25 | 3,65 | Juvenile | F | NR  |
| 31,85 | 3,24 | Juvenile | F | NR  |
| 31,9  | 4,12 | Adult    | M | NR  |

**Table S5.** Summary results of the most parsimonious generalized linear mixed models (Akaike differences  $< 2$  from the best model) investigating the relationship between environmental variables on the activity of *Pipistrellus maderensis* in Porto Santo, archipelago of Madeira, Portugal. For each model, the model rank, the number of estimated parameters ( $K$ ), sample-size adjusted Akaike's information criterion ( $AIC_c$ ), Akaike differences ( $\Delta_i$ ), Akaike weights ( $w_i$ ), cumulative Akaike weight ( $Cum_w$ ), log-likelihood ( $\log(L)$ ), marginal  $R^2$  ( $mR^2$ ) and conditional  $R^2$  ( $cR^2$ ) are presented. Variable abbreviations: W = distance to the closest water source; NV = non-vegetated area; F = forest; and G = grassland.

| Model structure | Model rank | K | $AIC_c$ | $\Delta_i$ | $w_i$ | $Cum_w$ | $\log(L)$ |
|-----------------|------------|---|---------|------------|-------|---------|-----------|
| W + NV          | 1          | 4 | 374.8   | 0          | 0.112 | 0.112   | -182.936  |
| W               | 2          | 3 | 374.9   | 0.03       | 0.110 | 0.222   | -184.154  |
| W+F             | 3          | 4 | 375.8   | 0.90       | 0.071 | 0.293   | -183.387  |
| NV              | 4          | 3 | 375.8   | 0.98       | 0.069 | 0.362   | -184.626  |
| W + F + NV      | 5          | 5 | 376.5   | 1.68       | 0.048 | 0.410   | -182.515  |
| W + G           | 6          | 4 | 376.8   | 1.97       | 0.042 | 0.452   | -183.920  |

**Table S6:** Results of model averaging generalized linear mixed models ( $\Delta_{AIC} < 2$ ) analysing the effects of the landscape-use and distance to the closest water source on bat activity (number of bat passes).

| Predictor         | Estimate | Std. Error | Z value | $Pr(> z )$ | Conf 2.5% | Conf 97.5% | p-value                      |
|-------------------|----------|------------|---------|------------|-----------|------------|------------------------------|
| Intercept         | 4.9399   | 0.4069     | 11.795  | $<2e-16$   | 4.1190    | 5.7607     | <b><math>&lt;0.01</math></b> |
| Distance to water | -0.5396  | 0.2426     | 2.168   | 0.0301     | -1.0273   | -0.0519    | <b><math>&lt;0.05</math></b> |
| No-vegetated      | -0.5404  | 0.2426     | 1.422   | 0.1550     | -1.2851   | 0.2044     | $>0.05$                      |
| Forest            | 0.2148   | 0.1643     | 1.270   | 0.2039     | -0.1166   | 0.5463     | $>0.05$                      |
| Grassland         | 0.1297   | 0.1915     | 0.658   | 0.5108     | -0.2568   | 0.5163     | $>0.05$                      |

**Table S7:** Moran's *I* test for the residuals generalized linear mixed models ( $\Delta AIC < 2$ ) analysed the effects of the landscape-use and distance to the closest water source on bat activity (number of bat passes). Significant ( $P < 0.05$ ) are highlighted in bold. Abbreviations: distance to the closest water source (W), non-vegetated area (NV), forest (F) and grassland (G).

| Model structure | Observed | Expected | SD   | p-value          |
|-----------------|----------|----------|------|------------------|
| W + NV          | -0.08    | -0.02    | 0.03 | <b>&lt; 0.05</b> |
| W               | -0.09    | -0.02    | 0.03 | <b>&lt; 0.05</b> |
| W+F             | -0.09    | -0.02    | 0.03 | <b>&lt; 0.05</b> |
| NV              | -0.06    | -0.02    | 0.03 | 0.17             |
| W + F + NV      | -0.09    | -0.02    | 0.03 | <b>&lt; 0.05</b> |
| W + G           | -0.10    | -0.02    | 0.03 | <b>&lt; 0.05</b> |
